# Supplementary material
Source: PubMed Central journal article supplement (PMC3123377)
Supplement: NIHMS28559-supplement-table_S3.pdf [file NIHMS28559-supplement-table_S3.pdf]

**Supplementary Table S3.** Genes induced under iron-limitation in the chemostat and 24 h post-infection in the macrophage (Schnappinger *et al.*, 2003)

| <b>Rv no.</b> | <b>Gene name</b> | <b>Fold change</b> | <b>B score</b> | <b>Putative function</b>           |
|---------------|------------------|--------------------|----------------|------------------------------------|
| Rv0188        |                  | 5.39               | 6.05           | Conserved membrane protein         |
| Rv0244c       | fadE5            | 21.52              | 7.19           | Acyl-CoA dehydrogenase             |
| Rv0282        |                  | 6.16               | 4.95           | Conserved hypothetical protein     |
| ▼Rv0283       |                  | 5.17               | 5.39           | Conserved hypothetical protein     |
| ▼Rv0284       |                  | 3.77               | 1.40           | Conserved membrane protein         |
| Rv0350        | dnaK             | 3.80               | 5.99           | Chaperone protein                  |
| Rv0465c       |                  | 2.60               | 1.05           | Transcriptional regulatory protein |
| Rv0467        | aceA             | 7.19               | 4.52           | Isocitrate lyase                   |
| Rv0473        |                  | 1.93               | 0.38           | Conserved membrane protein         |
| Rv0560c       |                  | 9.29               | 8.77           | Benzoquinone methyltransferase     |
| Rv0563        | htpX             |                    |                | Protease/transmembrane heat shock  |
|               |                  | 1.98               | 0.50           | protein                            |
| Rv0712        |                  | 2.68               | 1.43           | Conserved hypothetical protein     |
| Rv0753c       | mmsA             |                    |                | Methylmalonate-semialdehyde        |
|               |                  | 4.06               | 3.90           | dehydrogenase                      |
| Rv0790c       |                  | 2.68               | 2.96           | Hypothetical protein               |
| Rv0823c       |                  | 3.75               | 5.98           | Transcriptional regulatory protein |
| Rv0885        |                  | 4.71               | 3.91           | Conserved hypothetical protein     |

|         |        |      |      |                                     |
|---------|--------|------|------|-------------------------------------|
| Rv1044  |        | 2.19 | 1.19 | Conserved hypothetical protein      |
| Rv1057  |        | 7.18 | 2.59 | Conserved hypothetical protein      |
| Rv1130  |        | 2.31 | 0.50 | Conserved hypothetical protein      |
| □Rv1144 |        | 1.97 | 1.23 | Short-chain dehydrogenase/reductase |
| Rv1148c |        | 2.69 | 3.49 | Conserved hypothetical protein      |
| Rv1342c | pks14  | 1.96 | 0.40 | Conserved membrane protein          |
| Rv1345  | fadD33 | 4.35 | 7.08 | Polyketide synthase                 |
| Rv1346  | fadE14 | 4.60 | 5.62 | Acyl-CoA dehydrogenase              |
| Rv1349  |        |      |      | Drugs transport transmembrane ATP-  |
|         |        | 5.56 | 0.51 | binding ABC transporter             |
| Rv1461  |        | 7.24 | 6.29 | Conserved hypothetical protein      |
| Rv1462  |        | 3.11 | 2.68 | Conserved hypothetical protein      |
| Rv1464  | csd    | 4.93 | 5.89 | Cysteine desulfurase                |
| □Rv1465 |        | 7.48 | 3.31 | Nitrogen fixation related protein   |
| Rv1466  |        | 2.77 | 2.70 | Conserved hypothetical protein      |
| Rv1592c |        | 2.36 | 2.64 | Conserved hypothetical protein      |
| Rv1685c |        | 3.04 | 2.55 | Conserved hypothetical protein      |
| Rv1774  |        | 2.70 | 2.18 | Oxidoreductase                      |
| Rv1854c | ndh    | 2.50 | 3.83 | NADH dehydrogenase                  |
| Rv1992c | ctpC   | 4.09 | 5.74 | Metal cation transporter            |
| Rv2005c |        | 2.76 | 2.70 | Conserved hypothetical protein      |
| Rv2379c | mbtF   | 5.15 | 0.50 | Peptide synthetase                  |
| Rv2380c | mbtE   | 5.03 | 3.29 | Peptide synthetase                  |

|          |         |      |      |                                                           |
|----------|---------|------|------|-----------------------------------------------------------|
| Rv2381c  | mbtD    | 4.37 | 0.10 | Polyketide synthetase                                     |
| Rv2383c  | mbtB    | 8.35 | 4.31 | Phenyloxazoline synthase                                  |
| Rv2384   | mbtA    | 4.49 | 2.55 | Salicyl-AMP ligase                                        |
| Rv2385   | mbtJ    | 3.94 | 3.63 | Acetyl hydrolase                                          |
| Rv2386c  | mbtI    | 8.98 | 1.56 | Isochorismate synthase                                    |
| Rv2429   | ahpD    | 4.14 | 5.01 | Alkyl hydroperoxide reductase D                           |
| ▼Rv2620c |         | 5.54 | 7.14 | Conserved membrane protein                                |
| Rv2621c  |         | 2.89 | 4.56 | Transcriptional regulatory protein                        |
| Rv2622   |         | 2.54 | 2.99 | Methyltransferase                                         |
| Rv2643   | arsC    |      |      | Arsenic-transport integral membrane protein               |
|          |         | 2.43 | 0.26 |                                                           |
| Rv2651c  |         | 2.28 | 0.18 | Phirv2 prophage protease                                  |
| □Rv2707  |         |      |      | Conserved transmembrane alanine and leucine rich protein. |
|          |         | 1.97 | 0.13 |                                                           |
| Rv2710   | sigB    | 4.91 | 0.62 | RNA polymerase sigma factor sigB                          |
| Rv2744c  | 35kd_ag | 2.93 | 2.70 | 35KDa Alanine-rich protein                                |
| ▼Rv2745c |         | 2.20 | 0.94 | Transcriptional regulatory protein                        |
| ▼Rv2836c | dinF    | 4.18 | 2.80 | DNA damage inducible protein                              |
| Rv2930   | fadD26  | 4.15 | 4.66 | Fatty-acid-CoA ligase                                     |
| ▼Rv2978c |         | 1.96 | 1.09 | Transposase                                               |
| Rv3139   | fadD24  | 5.24 | 5.58 | Acyl-CoA dehydrogenase                                    |
| Rv3140   | fadD23  | 5.82 | 7.86 | Acyl-CoA dehydrogenase                                    |
| ▼Rv3290c | lat     | 3.74 | 0.19 | L-Lysine- epsilon aminotransferase                        |

|           |        |      |      |                                     |
|-----------|--------|------|------|-------------------------------------|
| □ Rv3335c |        | 2.26 | 0.18 | Conserved integral membrane protein |
| Rv3402c   |        | 3.90 | 1.43 | Conserved hypothetical protein      |
| Rv3562    | fadE31 | 2.09 | 1.90 | Acyl-CoA dehydrogenase              |
| □ Rv3581c | ispF   |      |      | 2C-methyl-D-erythritol 2,4-         |
|           |        | 2.87 | 2.22 | cyclodiphosphate synthase           |
| □ Rv3582c | ispD   |      |      | 4-diphosphocytidyl-2C-methyl-D-     |
|           |        | 3.64 | 3.43 | erythritolsynthase                  |
| ▼ Rv3756c | proZ   |      |      | Osmoprotectant transport integral   |
|           |        | 2.24 | 1.42 | membrane protein                    |
| ▼ Rv3839  |        | 5.74 | 5.01 | Conserved hypothetical              |

▼ Genes induced in BALB/c mice after 21 days of infection (Talaat *et al.*, 2004).

□ Genes required for growth in C57BL/6J mice (Sasseti *et al.*, 2003).
