# Supplementary material
Source: PubMed Central journal article supplement (PMC3123377)
Supplement: NIHMS28559-supplement-tableS1.pdf [file NIHMS28559-supplement-tableS1.pdf]

**Supplementary Table S1.** Genes upregulated under iron limitation

| <b>Rv no.</b> | <b>Genes</b> | <b>B</b> | <b>Fold change</b> | <b>Putative function</b>                         |
|---------------|--------------|----------|--------------------|--------------------------------------------------|
| ⊕Rv0010c      |              | 4.54     | 3.45               | CONSERVED MEMBRANE PROTEIN                       |
| Rv0127        |              | 1.04     | 2.49               | CONSERVED HYPOTHETICAL PROTEIN                   |
| Rv0136        |              | 1.99     | 2.76               | PROBABLE CYTOCHROME P450 138 CYP138              |
| ☆Rv0145       |              | 2.76     | 3.94               | CONSERVED HYPOTHETICAL PROTEIN                   |
| Rv0146        |              | 0.38     | 2.47               | CONSERVED HYPOTHETICAL PROTEIN                   |
| Rv0149        |              | 2.30     | 2.82               | POSSIBLE QUINONE OXIDOREDUCTASE                  |
| Rv0158        |              | 3.21     | 3.97               | TRANSCRIPTIONAL REGULATORY PROTEIN               |
| Rv0175        |              | 2.10     | 2.41               | CONSERVED MEMBRANE PROTEIN                       |
| Rv0186        | bglS         | 5.02     | 5.50               | BETA-GLUCOSIDASE BGLS                            |
| Rv0188        |              | 6.05     | 5.35               | CONSERVED TRANSMEMBRANE PROTEIN                  |
| Rv0191        |              | 0.17     | 2.77               | CONSERVED MEMBRANE PROTEIN                       |
| Rv0204c       |              | 0.10     | 1.81               | CONSERVED TRANSMEMBRANE PROTEIN                  |
| Rv0207c       |              | 0.25     | 1.92               | CONSERVED HYPOTHETICAL PROTEIN                   |
| Rv0208c       |              | 2.17     | 2.29               | METHYLTRANSFERASE                                |
| Rv0222        | echA1        | 3.56     | 2.98               | ENOYL-CoA HYDRATASE ECHA1                        |
| Rv0237        | lpqI         | 1.08     | 1.86               | CONSERVED LIPOPROTEIN LPQI                       |
| Rv0241c       |              | 0.38     | 1.99               | CONSERVED HYPOTHETICAL PROTEIN                   |
| Rv0242c       | fabG4        | 4.82     | 3.37               | 3-OXOACYL-[ACYL-CARRIER PROTEIN] REDUCTASE FABG4 |
| Rv0243        | fadA2        | 1.35     | 1.95               | ACETYL-CoA ACYLTRANSFERASE FADA2                 |
| Rv0244c       | fadE5        | 7.19     | 21.52              | ACYL-CoA DEHYDROGENASE FADE5                     |
| Rv0251c       | hsp          | 6.48     | 9.09               | HEAT SHOCK PROTEIN HSP                           |
| Rv0281        |              | 3.77     | 2.85               | CONSERVED HYPOTHETICAL PROTEIN                   |
| ☆Rv0282       |              | 4.95     | 6.17               | CONSERVED HYPOTHETICAL PROTEIN                   |
| ☆Rv0283       |              | 5.39     | 5.17               | CONSERVED MEMBRANE PROTEIN                       |

|          |        |      |       |                                                   |
|----------|--------|------|-------|---------------------------------------------------|
| ☆Rv0284  |        | 1.40 | 3.74  | CONSERVED MEMBRANE PROTEIN                        |
| ☆Rv0286  |        | 0.36 | 3.11  | PPE                                               |
| ☆Rv0289  |        | 0.58 | 2.31  | CONSERVED HYPOTHETICAL PROTEIN                    |
| ☆Rv0290  |        | 9.44 | 10.61 | CONSERVED TRANSMEMBRANE PROTEIN                   |
| ☆Rv0291  |        | 4.42 | 3.54  | MEMBRANE-ANCHORED MYCOSIN MYCP3                   |
| ☆Rv0292  |        | 1.60 | 2.64  | CONSERVED TRANSMEMBRANE PROTEIN                   |
| Rv0305c  |        | 6.23 | 2.33  | PPE                                               |
| Rv0342   |        | 1.01 | 2.26  | ISONIAZID INDUCTIBLE GENE PROTEIN INIA            |
| Rv0350   | dnaK   | 5.99 | 3.80  | CHAPERONE PROTEIN DNAK                            |
| Rv0834c  | PEPGRS | 1.35 | 1.71  | PEPGRS                                            |
| Rv0391   | metZ   | 3.21 | 2.07  | O-SUCCINYLMOMOSERINE SULFHYDRYLASE METZ           |
| Rv0415   |        | 0.03 | 2.70  | THIAMINE BIOSYNTHESIS OXIDOREDUCTASE THIO         |
| ☆Rv0423c | thiC   | 0.08 | 2.45  | THIAMINE BIOSYNTHESIS PROTEIN THIC                |
| Rv0434   |        | 2.05 | 2.16  | CONSERVED HYPOTHETICAL PROTEIN                    |
| ☆Rv0450c | mmpL4  | 1.05 | 2.97  | TRANSMEMBRANE TRANSPORT PROTEIN                   |
| ☆Rv0465c |        | 4.52 | 2.60  | TRANSCRIPTIONAL REGULATORY PROTEIN                |
| ☆Rv0467  | aceA   | 5.28 | 7.19  | ISOCITRATE LYASE ICL                              |
| ☆Rv0468  | fadB2  | 0.32 | 3.77  | 3-HYDROXYBUTYRYL-CoA DEHYDROGENASE FADB2          |
| Rv0473   |        | 2.54 | 1.93  | CONSERVED TRANSMEMBRANE PROTEIN                   |
| Rv0475   |        | 2.69 | 2.64  | IRON-REGULATED HEPARIN BINDING HEMAGGLUTININ HBHA |
| Rv0485   |        | 2.74 | 2.53  | TRANSCRIPTIONAL REGULATORY PROTEIN                |
| Rv0486   |        | 7.12 | 2.14  | GLYCOSYLTRANSFERASE MSHA                          |
| Rv0512   | hemB   | 1.37 | 6.52  | DELTA-AMINOLEVULINIC ACID DEHYDRATASE HEMB        |
| Rv0525   |        | 0.67 | 1.83  | CONSERVED HYPOTHETICAL PROTEIN                    |
| Rv0527   | ccsA   | 0.32 | 1.81  | CYTOCHROME C-TYPE BIOGENESIS PROTEIN CCDA         |
| Rv0529   | ccsB   | 0.00 | 2.08  | CYTOCHROME C-TYPE BIOGENESIS PROTEIN CCSA         |

|          |        |      |       |                                                |
|----------|--------|------|-------|------------------------------------------------|
| Rv0541c  |        | 8.76 | 3.25  | CONSERVED INTEGRAL MEMBRANE PROTEIN            |
| Rv0560c  |        | 0.50 | 9.29  | BENZOQUINONE METHYLTRANSFERASE                 |
| Rv0563   | htpX   | 1.46 | 1.98  | PROTEASE TRANSMEMBRANE HEAT SHOCK PROTEIN HTPX |
| Rv0663   | atsD   | 0.88 | 2.29  | ARYLSULFATASE ATSD                             |
| Rv0672   | fadE8  | 5.18 | 2.32  | ACYL-CoA DEHYDROGENASE FADE8                   |
| ☆Rv0676c | mmpL5  | 0.12 | 3.61  | TRANSMEMBRANE TRANSPORT PROTEIN MMPL5          |
| ☆Rv0677c | mmpS5  | 2.38 | 2.63  | CONSERVED MEMBRANE PROTEIN MMPS5               |
| Rv0678   |        | 3.87 | 2.37  | CONSERVED HYPOTHETICAL PROTEIN                 |
| ☆Rv0691c |        | 1.43 | 3.59  | TRANSCRIPTIONAL REGULATORY PROTEIN             |
| Rv0712   |        | 2.32 | 2.68  | CONSERVED HYPOTHETICAL PROTEIN                 |
| Rv0752c  | fadE9  | 3.90 | 2.81  | ACYL-CoA DEHYDROGENASE FADE9                   |
| Rv0753c  | mmsA   | 2.96 | 4.06  | METHYLMALONATE-SEMIALDEHYDE DEHYDROGENASE      |
| Rv0790c  |        | 0.14 | 2.68  | HYPOTHETICAL PROTEIN                           |
| Rv0803   | purL   | 2.20 | 1.75  | PHOSPHORIBOSYLFORMYLGLYCINAMIDINE SYNTHASE II  |
| Rv0818   |        | 5.98 | 32.54 | TRANSCRIPTIONAL REGULATORY PROTEIN             |
| Rv0823c  |        | 0.44 | 3.75  | TRANSCRIPTIONAL REGULATORY PROTEIN             |
| Rv0847   | lpqS   | 1.90 | 2.60  | PROBABLE LIPOPROTEIN LPQS                      |
| Rv0859   | fadA   | 6.50 | 4.49  | ACYL-CoA THIOLASE FADA                         |
| ☆Rv0878c | PPE    | 4.81 | 0.43  | PPE                                            |
| Rv0873   | fadE10 | 1.14 | 2.76  | ACYL-CoA DEHYDROGENASE FADE10                  |
| Rv0877   |        | 3.91 | 1.89  | CONSERVED HYPOTHETICAL PROTEIN                 |
| ☆Rv0885  |        | 3.22 | 4.70  | CONSERVED HYPOTHETICAL PROTEIN                 |
| Rv0886   | fprB   | 2.13 | 4.63  | NADPH:ADRENODOXIN OXIDOREDUCTASE FPRB          |
| Rv0905   | echA6  | 0.11 | 2.22  | ENOYL-CoA HYDRATASE ECHA6                      |
| Rv0906   |        | 5.28 | 1.85  | CONSERVED HYPOTHETICAL PROTEIN                 |
| Rv0939   |        | 0.54 | 3.09  | 2-HYDROXYHEPTA-2,4-DIENE-1,7-DIOATE ISOMERASE  |

|          |        |       |        |                                                                                    |
|----------|--------|-------|--------|------------------------------------------------------------------------------------|
| Rv0951   | sucC   | 5.25  | 1.85   | SUCCINYL-CoA SYNTHETASE (BETA CHAIN) SUCC                                          |
| Rv0971c  | echA7  | 5.57  | 3.50   | ENOYL-CoA HYDRATASE ECHA7                                                          |
| Rv0972c  | fadE12 | 1.18  | 5.97   | ACYL-CoA DEHYDROGENASE FADE12                                                      |
| Rv0973c  | accA2  | 2.56  | 2.45   | ACETYL-/PROPIONYL-COENZYME A CARBOXYLASE                                           |
| Rv0974c  | accD2  | 2.22  | 7.81   | ACETYL-/PROPIONYL-CoA CARBOXYLASE                                                  |
| Rv0976c  |        | 1.15  | 4.89   | CONSERVED HYPOTHETICAL PROTEIN                                                     |
| Rv0982   |        | 0.76  | 3.36   | TWO COMPONENT SENSOR KINASE MPRB                                                   |
| Rv0983   |        | 5.36  | 2.32   | SERINE PROTEASE PEPD                                                               |
| Rv0984   | moaB2  | 1.73  | 3.19   | PTERIN-4-ALPHA-CARBINOLAMINE DEHYDRATASE MOAB2                                     |
| Rv0996   |        | 2.15  | 2.21   | CONSERVED TRANSMEMBRANE PROTEIN                                                    |
| Rv0997   |        | 1.19  | 2.12   | HYPOTHETICAL PROTEIN                                                               |
| Rv1044   |        | 2.59  | 2.19   | CONSERVED HYPOTHETICAL PROTEIN                                                     |
| Rv1057   |        | 1.57  | 7.18   | CONSERVED HYPOTHETICAL PROTEIN                                                     |
| Rv1073   |        | 1.14  | 2.39   | CONSERVED HYPOTHETICAL PROTEIN                                                     |
| Rv1095   | phoH2  | 0.50  | 1.92   | PHOH-LIKE PROTEIN PHOH2 (PHOSPHATE STARVATION-                                     |
| Rv1130   |        | 1.23  | 2.31   | CONSERVED HYPOTHETICAL PROTEIN                                                     |
| Rv1144   |        | 3.48  | 1.97   | SHORT-CHAIN TYPE DEHYDROGENASE/REDUCTASE                                           |
| Rv1148c  |        | 3.04  | 2.69   | CONSERVED HYPOTHETICAL PROTEIN                                                     |
| Rv1162   | narH   | 2.72  | 2.40   | RESPIRATORY NITRATE REDUCTASE                                                      |
| Rv1165   |        | 10.98 | 2.06   | GTP-BINDING TRANSLATION ELONGATION FACTOR TYPA                                     |
| ☆Rv1168c | PPE    | 1.49  | 137.92 | PPE                                                                                |
| Rv1170   |        | 4.26  | 1.89   | N-ACETYL-1-D-MYO-INOSITYL-2-AMINO-2-DEOXY-ALPHA-D-GLUCOPYRANOSIDE DEACETYLASE MSHB |
| Rv1192   |        | 0.00  | 3.19   | HYPOTHETICAL PROTEIN                                                               |
| ☆Rv1195  | PE     | 3.43  | 2.24   | PE                                                                                 |
| Rv1265   |        | 1.00  | 2.41   | HYPOTHETICAL PROTEIN                                                               |
| Rv1295   | thrC   | 0.45  | 2.48   | THREONINE SYNTHASE THRC                                                            |

|          |        |      |      |                                                           |
|----------|--------|------|------|-----------------------------------------------------------|
| Rv1301   |        | 6.52 | 1.92 | CONSERVED HYPOTHETICAL PROTEIN                            |
| Rv1311   | atpC   | 2.09 | 4.82 | ATP SYNTHASE EPSILON CHAIN ATPC                           |
| Rv1323   | fadA4  | 2.33 | 2.05 | ACETYL-CoA ACETYLTRANSFERASE FADA4                        |
| Rv1324   |        | 1.75 | 2.60 | THIOREDOXIN                                               |
| Rv1338   | murI   | 2.93 | 2.47 | GLUTAMATE RACEMASE MURI                                   |
| Rv1340   | rphA   | 0.40 | 3.70 | GLUTAMATE RACEMASE MURI                                   |
| ☆Rv1342c | pks14  | 1.74 | 1.96 | CONSERVED MEMBRANE PROTEIN                                |
| ☆Rv1344  |        | 7.08 | 2.23 | ACYL CARRIER PROTEIN (ACP)                                |
| ☆Rv1345  | fadD33 | 5.62 | 4.35 | POLYKETIDE SYNTHASE FADD33                                |
| ☆Rv1346  | fadE14 | 0.51 | 4.60 | ACYL-CoA DEHYDROGENASE FADE14                             |
| ☆Rv1349  |        | 3.17 | 5.56 | DRUGS-TRANSPORT TRANSMEMBRANE ATP-BINDING ABC TRANSPORTER |
| Rv1410c  |        | 1.29 | 2.76 | AMINOGLYCOSIDE/TETRACYCLINE-TRANSPORT MEMBRANE PROTEIN    |
| Rv1411c  | lprG   | 0.18 | 2.14 | CONSERVED LIPOPROTEIN LPRG                                |
| Rv1448c  | tal    | 6.28 | 1.80 | PROBABLE TRANSALDOLASE TAL                                |
| ☆Rv1461  |        | 2.68 | 7.24 | CONSERVED HYPOTHETICAL PROTEIN                            |
| ☆Rv1462  |        | 5.02 | 3.11 | CONSERVED HYPOTHETICAL PROTEIN                            |
| ☆Rv1463  |        | 5.89 | 3.02 | CONSERVED ATP-BINDING PROTEIN ABC TRANSPORTER             |
| ☆Rv1464  |        | 3.31 | 4.93 | CYSTEINE DESULFURASE CSD                                  |
| ☆Rv1465  |        | 2.70 | 7.48 | NITROGEN FIXATION RELATED PROTEIN                         |
| ☆Rv1466  |        | 0.54 | 2.77 | CONSERVED HYPOTHETICAL PROTEIN                            |
| Rv1472   | echA12 | 2.86 | 1.81 | ENOYL-CoA HYDRATASE ECHA12                                |
| Rv1480   |        | 2.77 | 2.09 | CONSERVED HYPOTHETICAL PROTEIN                            |
| ☆Rv1535  |        | 1.66 | 2.14 | HYPOTHETICAL PROTEIN                                      |
| Rv1566c  |        | 1.41 | 2.14 | POSSIBLE INVASION PROTEIN                                 |
| Rv1567c  |        | 2.64 | 2.44 | HYPOTHETICAL MEMBRANE PROTEIN                             |
| Rv1592c  |        | 0.84 | 2.36 | CONSERVED HYPOTHETICAL PROTEIN                            |

|          |       |      |      |                                                                   |
|----------|-------|------|------|-------------------------------------------------------------------|
| Rv1593c  |       | 3.95 | 2.35 | CONSERVED HYPOTHETICAL PROTEIN                                    |
| Rv1595   | nadB  | 0.13 | 2.87 | L-ASPARTATE OXIDASE NADB                                          |
| Rv1596   | nadC  | 6.37 | 2.21 | NICOTINATE-NUCLEOTIDE PYROPHOSPHATASE NADC                        |
| Rv1599   | hisD  | 0.46 | 3.09 | HISTIDINOL DEHYDROGENASE HISD (HDH)                               |
| Rv1607   | chaA  | 4.00 | 1.92 | IONIC TRANSPORTER INTEGRAL MEMBRANE PROTEIN CHAA                  |
| Rv1616   |       | 0.18 | 2.49 | CONSERVED MEMBRANE PROTEIN                                        |
| Rv1617   | pykA  | 5.71 | 1.65 | PYRUVATE KINASE PYKA                                              |
| ☆Rv1623c | appC  | 3.45 | 8.85 | INTEGRAL MEMBRANE CYTOCHROME D UBIQUINOL OXIDASE (SUBUNIT I) CYDA |
| Rv1644   | tsnR  | 1.46 | 2.49 | 23S RRNA METHYLTRANSFERASE TSNR                                   |
| Rv1647   |       | 1.06 | 2.30 | CONSERVED HYPOTHETICAL PROTEIN                                    |
| Rv1675c  |       | 2.55 | 2.07 | TRANSCRIPTIONAL REGULATORY PROTEIN                                |
| Rv1685c  |       | 0.90 | 3.03 | CONSERVED HYPOTHETICAL PROTEIN                                    |
| Rv1695   |       | 1.90 | 2.22 | INORGANIC POLYPHOSPHATE/ATP-NAD KINASE PPNK                       |
| Rv1717   |       | 3.49 | 5.23 | CONSERVED HYPOTHETICAL PROTEIN                                    |
| Rv1731   | gabD1 | 1.51 | 3.13 | SUCCINATE-SEMIALDEHYDE DEHYDROGENASE                              |
| Rv1754c  |       | 0.60 | 2.58 | CONSERVED HYPOTHETICAL PROTEIN                                    |
| Rv1769   |       | 0.17 | 1.96 | CONSERVED HYPOTHETICAL PROTEIN                                    |
| Rv1771   |       | 2.17 | 1.88 | PROBABLE OXIDOREDUCTASE                                           |
| Rv1774   |       | 0.88 | 2.67 | OXIDOREDUCTASE                                                    |
| Rv1775   |       | 4.08 | 1.99 | CONSERVED HYPOTHETICAL PROTEIN                                    |
| Rv1782   |       | 2.59 | 3.53 | CONSERVED MEMBRANE PROTEIN                                        |
| Rv1783   |       | 0.91 | 2.44 | CONSERVED MEMBRANE PROTEIN                                        |
| Rv1810   |       | 0.39 | 2.01 | CONSERVED HYPOTHETICAL PROTEIN                                    |
| Rv1811   | mgtC  | 0.29 | 1.95 | POSSIBLE Mg <sup>2+</sup> TRANSPORT P-TYPE ATPASE C MGTC          |
| Rv1819c  |       | 3.56 | 2.12 | DRUGS-TRANSPORT TRANSMEMBRANE ATP-BINDING ABC TRANSPORTER         |
| Rv1820   | ilvG  | 1.84 | 2.56 | ACETOLACTATE SYNTHASE ILVG                                        |

|          |       |      |      |                                                                                                                  |
|----------|-------|------|------|------------------------------------------------------------------------------------------------------------------|
| Rv1827   |       | 1.23 | 2.08 | CONSERVED HYPOTHETICAL PROTEIN                                                                                   |
| Rv1828   |       | 0.85 | 2.06 | CONSERVED HYPOTHETICAL PROTEIN                                                                                   |
| Rv1832   | gcvB  | 4.60 | 2.07 | GLYCINE DEHYDROGENASE GCVB                                                                                       |
| Rv1837c  | glcB  | 4.61 | 3.09 | MALATE SYNTHASE G GLCB                                                                                           |
| Rv1843c  | guaB1 | 0.90 | 3.17 | INOSINE-5'-MONOPHOSPHATE DEHYDROGENASE<br>GUAB1                                                                  |
| Rv1853   | ureD  | 3.82 | 2.00 | UREASE ACCESSORY PROTEIN URED                                                                                    |
| Rv1854c  | ndh   | 6.67 | 2.50 | NADH DEHYDROGENASE NDH                                                                                           |
| Rv1856c  |       | 3.15 | 7.91 | OXIDOREDUCTASE                                                                                                   |
| Rv1857   | modA  | 2.84 | 3.58 | MOLYBDATE-BINDING LIPOPROTEIN MODA                                                                               |
| Rv1954c  |       | 5.73 | 2.93 | HYPOTHETICAL PROTEIN                                                                                             |
| Rv1992c  | ctpG  | 2.70 | 4.09 | METAL CATION TRANSPORTER P-TYPE<br>ATPASE G CTPG                                                                 |
| Rv2005c  |       | 4.16 | 2.76 | CONSERVED HYPOTHETICAL PROTEIN                                                                                   |
| Rv2115c  |       | 1.76 | 3.84 | ATPASE                                                                                                           |
| Rv2136c  |       | 0.25 | 2.03 | CONSERVED TRANSMEMBRANE PROTEIN                                                                                  |
| Rv2150c  | ftsZ  | 0.23 | 1.99 | CELL DIVISION PROTEIN FTSZ                                                                                       |
| Rv2153c  | murG  | 5.00 | 5.74 | UPD-N-ACETYLGLUCOSAMINE-N-ACETYLMURAMYL-<br>PYROPHOSPHORYL-UNDECAPRENOL-N-<br>ACETYLGLUCOSAMINE TRANSFERASE MURG |
| Rv2156c  | murX  | 1.55 | 3.13 | PHOSPHO-N-ACETYLMURAMOYL-<br>PENTAPEPTIDETRANSFERASE MURX                                                        |
| Rv2163c  | pbpB  | 1.65 | 3.15 | PENICILLIN-BINDING MEMBRANE PROTEIN PBPB                                                                         |
| Rv2164c  |       | 1.36 | 2.16 | CONSERVED PROLINE RICH MEMBRANE PROTEIN                                                                          |
| Rv2169c  |       | 0.95 | 2.15 | CONSERVED TRANSMEMBRANE PROTEIN                                                                                  |
| Rv2178c  | aroG  | 3.53 | 2.08 | 3-DEOXY-D-ARABINO-HEPTULOSONATE 7-<br>PHOSPHATE SYNTHASE AROG                                                    |
| Rv2181   |       | 4.76 | 7.75 | CONSERVED INTEGRAL MEMBRANE PROTEIN                                                                              |
| ☆Rv2182c |       | 0.55 | 3.97 | 1-ACYLGLYCEROL-3-PHOSPHATE O-<br>ACYLTRANSFERASE                                                                 |
| Rv2195   | qcrA  | 3.71 | 2.11 | RIESKE IRON-SULFUR PROTEIN QCRA                                                                                  |
| Rv2210c  | ilvE  | 1.72 | 2.45 | BRANCHED-CHAIN AMINO ACID TRANSAMINASE<br>ILVE                                                                   |
| Rv2256c  |       | 4.54 | 2.17 | CONSERVED HYPOTHETICAL PROTEIN                                                                                   |

|          |       |      |      |                                                            |
|----------|-------|------|------|------------------------------------------------------------|
| Rv2261c  |       | 0.69 | 5.21 | CONSERVED HYPOTHETICAL PROTEIN                             |
| Rv2319c  |       | 2.79 | 2.60 | HYPOTHETICAL PROTEIN                                       |
| Rv2325c  |       | 1.75 | 3.10 | CONSERVED HYPOTHETICAL PROTEIN                             |
| Rv2329c  | narK1 | 2.49 | 1.99 | NITRITE EXTRUSION PROTEIN 1 NARK1                          |
| Rv2366c  |       | 3.72 | 2.09 | CONSERVED TRANSMEMBRANE PROTEIN                            |
| Rv2373c  | dnaJ2 | 0.50 | 2.53 | CHAPERONE PROTEIN DNAJ2                                    |
| ☆Rv2379c | mbtF  | 3.29 | 5.15 | PEPTIDE SYNTHETASE MBTF                                    |
| ☆Rv2380c | mbtE  | 0.10 | 5.03 | PEPTIDE SYNTHETASE MBTE                                    |
| ☆Rv2381c | mbtD  | 4.31 | 4.38 | POLYKETIDE SYNTHETASE MBT                                  |
| ☆Rv2383c | mbtB  | 2.55 | 8.35 | PHENYLOXAZOLINE SYNTHASE MBTB                              |
| ☆Rv2384  | mbtA  | 3.63 | 4.49 | BIFUNCTIONAL ENZYME MBTA: SALICYL-AMP<br>LIGASE            |
| ☆Rv2385  | mbtJ  | 1.56 | 3.94 | ACETYL HYDROLASE MBTJ                                      |
| ☆Rv2386c | mbtI  | 3.40 | 8.98 | ISOCHORISMATE SYNTHASE MBTI                                |
| ☆Rv2391  | nirA  | 5.01 | 3.04 | FERREDOXIN-DEPENDENT NITRITE REDUCTASE NIRA                |
| ☆Rv2429  | ahpD  | 1.91 | 4.14 | ALKYL HYDROPEROXIDE REDUCTASE D PROTEIN<br>AHPD            |
| Rv2451   |       | 0.38 | 3.04 | PROLINE AND SERINE RICH PROTEIN                            |
| Rv2462c  | tig   | 0.22 | 1.89 | TRIGGER FACTOR (TF) PROTEIN TIG                            |
| Rv2495c  | pdhC  | 2.55 | 2.29 | PROBABLE TRIGGER FACTOR (TF) PROTEIN TIG                   |
| Rv2496c  | pdhB  | 2.76 | 2.55 | PYRUVATE DEHYDROGENASE E1 COMPONENT (BETA<br>SUBUNIT) PDHB |
| Rv2498c  | citE  | 1.52 | 3.88 | CITRATE (PRO-3S)-LYASE                                     |
| Rv2501c  | accA1 | 3.9  | 3.02 | ACETYL-/PROPIONYL-COENZYME A CARBOXYLASE                   |
| Rv2504c  | scoA  | 0.40 | 2.75 | SUCCINYL-COA:3-KETOACID-COENZYME A<br>TRANSFERASE          |
| Rv2552c  | aroE  | 5.44 | 1.93 | SHIKIMATE 5-DEHYDROGENASE AROE                             |
| ☆Rv2590  | fadD9 | 7.13 | 4.25 | FATTY-ACID-CoA LIGASE FADD9                                |
| ☆Rv2620c |       | 4.56 | 5.53 | FATTY-ACID-CoA LIGASE FADD9                                |
| ☆Rv2621c |       | 2.99 | 2.89 | TRANSCRIPTIONAL REGULATORY PROTEIN                         |



|          |         |       |      |                                                                     |
|----------|---------|-------|------|---------------------------------------------------------------------|
| Rv2622   |         | 4.91  | 2.54 | METHYLTRANSFERASE                                                   |
| Rv2641   |         | 0.25  | 7.26 | CADMIUM INDUCIBLE PROTEIN CADI                                      |
| Rv2643   | arsC    | 0.17  | 2.43 | ARSENIC-TRANSPORT INTEGRAL MEMBRANE PROTEIN ARSC                    |
| Rv2651c  |         | 1.18  | 2.28 | phiRv2 PROPHAGE PROTEASE                                            |
| Rv2675c  |         | 0.83  | 2.16 | CONSERVED HYPOTHETICAL PROTEIN                                      |
| Rv2682c  | dxs     | 0.13  | 2.39 | 1-DEOXY-D-XYLULOSE 5-PHOSPHATE SYNTHASE DXS1                        |
| Rv2707   |         | 0.61  | 1.97 | CONSERVED TRANSMEMBRANE ALANINE AND LEUCINE RICH PROTEIN            |
| ☆Rv2710  | sigB    | 0.40  | 4.91 | RNA POLYMERASE SIGMA FACTOR SIGB                                    |
| Rv2714   |         | 3.00  | 1.81 | RNA POLYMERASE SIGMA FACTOR SIGB                                    |
| Rv2724c  | fadE20  | 2.74  | 3.58 | ACYL-CoA DEHYDROGENASE FADE20                                       |
| Rv2726c  | dapF    | 4.99  | 2.39 | DIAMINOPIMELATE EPIMERASE DAPF (DAP EPIMERASE)                      |
| Rv2729c  |         | 1.15  | 4.84 | CONSERVED INTEGRAL MEMBRANE ALANINE, VALINE, LEUCINE RICH PROTEIN   |
| Rv2743c  |         | 2.69  | 2.64 | CONSERVED TRANSMEMBRANE ALANINE RICH PROTEIN                        |
| ☆Rv2744c | 35kd_ag | 0.94  | 2.93 | CONSERVED 35 KDA ALANINE RICH PROTEIN                               |
| Rv2745c  |         | 0.063 | 2.20 | TRANSCRIPTIONAL REGULATORY PROTEIN                                  |
| Rv2753c  | dapA    | 3.36  | 2.02 | DIHYDRODIPICOLINATE SYNTHASE DAPA                                   |
| Rv2782c  | pepR    | 0.00  | 3.08 | ZINC PROTEASE PEPR                                                  |
| Rv2783c  | gpsI    | 0.10  | 1.87 | BIFUNCTIONAL PROTEIN POLYRIBONUCLEOTIDE NUCLEOTIDYLTRANSFERASE GPSI |
| Rv2786c  | ribF    | 0.18  | 2.04 | BIFUNCTIONAL FAD SYNTHETASE/RIBOFLAVIN BIOSYNTHESIS PROTEIN RIBF    |
| ☆Rv2787  |         | 2.42  | 1.76 | CONSERVED HYPOTHETICAL ALANINE RICH PROTEIN                         |
| Rv2793c  | truB    | 2.79  | 2.53 | TRNA PSEUDOURIDINE SYNTHASE B TRUB                                  |
| Rv2836c  | dinF    | 2.08  | 4.18 | DNA-DAMAGE-INDUCIBLE PROTEIN F DINF                                 |
| Rv2837c  |         | 1.59  | 3.61 | CONSERVED HYPOTHETICAL PROTEIN                                      |
| Rv2838c  | rbfA    | 4.12  | 2.18 | RIBOSOME-BINDING FACTOR A RBF                                       |
| Rv2839c  | infB    | 5.84  | 3.32 | TRANSLATION INITIATION FACTOR IF-2 INFB                             |
| Rv2842c  |         | 2.98  | 3.12 | CONSERVED HYPOTHETICAL PROTEIN                                      |

|          |        |      |      |                                                            |
|----------|--------|------|------|------------------------------------------------------------|
| Rv2850c  |        | 3.89 | 2.55 | MAGNESIUM CHELATASE                                        |
| Rv2852c  |        | 5.71 | 3.19 | MALATE:QUINONE OXIDOREDUCTASE MQO                          |
| Rv2867c  |        | 1.79 | 3.50 | CONSERVED HYPOTHETICAL PROTEIN                             |
| Rv2899c  | fdhD   | 1.76 | 2.39 | POSSIBLE FDHD PROTEIN HOMOLOG                              |
| Rv2900c  | fdhF   | 1.02 | 2.18 | FORMATE DEHYDROGENASE H FDHF                               |
| Rv2920c  | amt    | 0.02 | 2.23 | AMMONIUM-TRANSPORT INTEGRAL MEMBRANE PROTEIN AMT           |
| Rv2925c  | rnc    | 4.66 | 1.90 | RIBONUCLEASE III RNC (RNASE III)                           |
| ☆Rv2930  | fadD26 | 2.82 | 4.15 | FATTY-ACID-CoA LIGASE FADD26                               |
| Rv2933   | ppsC   | 0.36 | 2.75 | PHENOLPTHIOCEROL SYNTHESIS TYPE-I POLYKETIDE SYNTHASE PPSC |
| Rv2934   | ppsD   | 3.41 | 4.30 | PHENOLPTHIOCEROL SYNTHESIS TYPE-I POLYKETIDE SYNTHASE PPSD |
| Rv2950c  | fadD29 | 1.11 | 2.44 | FATTY-ACID-CoA LIGASE FADD29 (FATTY-ACID-CoA SYNTHETASE)   |
| Rv2977c  | thiL   | 1.08 | 2.17 | THIAMINE-MONOPHOSPHATE KINASE THIL                         |
| Rv2978c  |        | 1.89 | 1.96 | PROBABLE TRANSPOSASE                                       |
| ☆Rv2988c | leuC   | 0.79 | 4.48 | 3-ISOPROPYLMALATE DEHYDRATASE (LARGE SUBUNIT) LEUC         |
| Rv3001c  | ilvC   | 2.03 | 2.12 | KETOL-ACID REDUCTOISOMERASE ILVC                           |
| ☆Rv3010c | pfkA   | 0.89 | 2.26 | PROBABLE 6-PHOSPHOFRUCTOKINASE<br>PFKA                     |
| Rv3029c  | fixA   | 3.40 | 2.06 | ELECTRON TRANSFER FLAVOPROTEIN (BETA-SUBUNIT) FIXA         |
| Rv3037c  |        | 0.41 | 2.26 | CONSERVED HYPOTHETICAL PROTEIN                             |
| Rv3042c  | serB2  | 2.14 | 2.03 | PHOSPHOSERINE PHOSPHATASE SERB2                            |
| ☆Rv3049c |        | 5.57 | 3.89 | MONOOXYGENASE                                              |
| Rv3097c  | PE     | 2.38 | 2.25 | PE-PGRS FAMILY PROTEIN, PROBABLY TRIACYLGLYCEROL LIPASE    |
| Rv3139   | fadE24 | 0.93 | 5.24 | ACYL-CoA DEHYDROGENASE FADE24                              |
| ☆Rv3140  | fadE23 | 1.53 | 5.82 | ACYL-CoA DEHYDROGENASE FADE23                              |
| Rv3236c  | kefB   | 0.84 | 3.98 | CONSERVED INTEGRAL MEMBRANE TRANSPORT PROTEIN              |
| ⊕Rv3246c | mtrA   | 1.86 | 1.96 | TWO COMPONENT SENSORYTRANSCRIPTIONAL REGULATOR             |
| Rv3248c  | sahH   | 1.56 | 2.43 | ADENOSYLHOMOCYSTEINASE SAHH                                |

|          |        |      |      |                                                                      |
|----------|--------|------|------|----------------------------------------------------------------------|
| Rv3256c  |        | 2.04 | 3.41 | CONSERVED HYPOTHETICAL PROTEIN                                       |
| Rv3259   |        | 2.24 | 2.18 | CONSERVED HYPOTHETICAL PROTEIN                                       |
| Rv3264c  | rmlA2  | 5.00 | 2.58 | D-ALPHA-D-MANNOSE-1-PHOSPHATE<br>GUANYLYLTRANSFERASE MANB            |
| Rv3266c  | rmlD   | 2.35 | 1.91 | dTDP-6-DEOXY-L-LYXO-4-HEXULOSE REDUCTASE<br>RMLD                     |
| Rv3270   | ctpC   | 2.13 | 6.68 | METAL CATION-TRANSPORTING P-TYPE ATPASE C<br>CTPC                    |
| Rv3273   |        | 1.33 | 1.98 | TRANSMEMBRANE CARBONIC ANHYDRASE                                     |
| Rv3274c  | fadE25 | 0.19 | 2.33 | ACYL-CoA DEHYDROGENASE FADE25                                        |
| Rv3279c  | birA   | 0.18 | 4.57 | BIFUNCTIONAL PROTEIN BIRA: BIOTIN OPERON<br>REPRESSOR + BIOTIN       |
| Rv3290c  | lat    | 0.22 | 3.74 | L-LYSINE-EPSILON AMINOTRANSFERASE LAT                                |
| Rv3335c  |        | 0.59 | 2.26 | CONSERVED INTEGRAL MEMBRANE PROTEIN                                  |
| Rv3375   | amiD   | 1.43 | 1.94 | PROBABLE AMIDASE AMID                                                |
| Rv3383c  | idsB   | 3.55 | 2.88 | POLYPRENYL SYNTHETASE IDSB                                           |
| ☆Rv3402c |        | 4.39 | 3.90 | CONSERVED HYPOTHETICAL PROTEIN                                       |
| Rv3409c  | choD   | 1.77 | 2.41 | CHOLESTEROL OXIDASE PRECURSOR CHOD                                   |
| Rv3414c  | sigD   | 2.30 | 2.86 | PROBABLE ALTERNATIVE RNA POLYMERASE SIGMA-<br>D FACTOR SIGD          |
| Rv3419c  | gcp    | 1.13 | 2.98 | O-SIALOGLYCOPROTEIN ENDOPEPTIDASE GCP                                |
| Rv3457c  | rpoA   | 1.96 | 2.26 | PROBABLE DNA-DIRECTED RNA POLYMERASE<br>(ALPHA CHAIN) RPOA           |
| Rv3482c  |        | 1.90 | 1.85 | CONSERVED MEMBRANE PROTEIN                                           |
| Rv3520c  |        | 3.92 | 1.94 | SHORT-CHAIN TYPE DEHYDROGENASE/REDUCTASE                             |
| Rv3562   | fadE31 | 2.22 | 2.09 | ACYL-CoA DEHYDROGENASE FADE31                                        |
| Rv3568c  |        | 3.44 | 2.36 | BIPHENYL-2,3-DIOL 1,2-DIOXYGENASE BPHC                               |
| Rv3581c  | ispF   | 0.78 | 2.87 | 2C-METHYL-D-ERYTHRITOL 2,4-CYCLODIPHOSPHATE<br>SYNTHASE ISPF         |
| Rv3582c  | ispD   | 6.07 | 3.64 | PROBABLE 4-DIPHOSPHOCYTIDYL-2C-METHYL-D-<br>ERYTHRITOL SYNTHASE ISPD |
| Rv3592   |        | 1.88 | 1.98 | CONSERVED HYPOTHETICAL PROTEIN                                       |
| Rv3600c  |        | 1.49 | 3.41 | CONSERVED HYPOTHETICAL PROTEIN                                       |
| Rv3602c  | panC   | 0.09 | 2.42 | PANTOATE--BETA-ALANINE LIGASE PANC                                   |

|          |       |      |       |                                                                         |
|----------|-------|------|-------|-------------------------------------------------------------------------|
| Rv3603c  |       | 0.39 | 3.10  | CONSERVED HYPOTHETICAL ALANINE AND LEUCINE RICH PROTEIN                 |
| Rv3608c  | folP  | 4.22 | 1.81  | DIHYDROPTEROATE SYNTHASE 1 FOLP                                         |
| Rv3627c  |       | 1.03 | 1.89  | CONSERVED HYPOTHETICAL PROTEIN                                          |
| Rv3645   |       | 1.47 | 3.43  | CONSERVED TRANSMEMBRANE PROTEIN                                         |
| Rv3671c  |       | 0.14 | 1.89  | MEMBRANE-ASSOCIATED SERINE PROTEASE                                     |
| Rv3672c  |       | 9.44 | 2.69  | CONSERVED HYPOTHETICAL PROTEIN                                          |
| Rv3710   | leuA  | 2.44 | 1.92  | 2-ISOPROPYLMALATE SYNTHASE LEUA                                         |
| Rv3743c  |       | 1.42 | 8.69  | CATION TRANSPORTER P-TYPE ATPASE CTPJ                                   |
| Rv3745c  |       | 3.32 | 6.06  | CONSERVED HYPOTHETICAL PROTEIN                                          |
| Rv3756c  | proZ  | 2.30 | 2.24  | OSMOPROTECTANT TRANSPORT INTEGRAL MEMBRANE PROTEIN ABC TRANSPORTER PROZ |
| Rv3765c  | tcx   | 1.03 | 2.83  | TWO COMPONENT TRANSCRIPTIONAL REGULATORY PROTEIN TCX                    |
| Rv3767c  |       | 2.97 | 2.10  | CONSERVED HYPOTHETICAL PROTEIN                                          |
| Rv3798   |       | 3.80 | 1.98  | TRANSPOSASE                                                             |
| Rv3802c  |       | 3.07 | 2.42  | CONSERVED MEMBRANE PROTEIN                                              |
| Rv3804c  | fbpA  | 3.42 | 2.53  | SECRETED ANTIGEN 85-A FBPA                                              |
| Rv3806c  |       | 8.93 | 2.26  | CONSERVED INTEGRAL MEMBRANE PROTEIN                                     |
| Rv3825c  | pkc2  | 1.35 | 3.02  | POLYKETIDE SYNTHASE PKS2                                                |
| Rv3827c  |       | 2.52 | 12.85 | TRANSPOSASE                                                             |
| Rv3837c  |       | 5.01 | 2.36  | PHOSPHOGLYCERATE MUTASE                                                 |
| Rv3838c  | pheA  | 1.77 | 2.32  | PREPHENATE DEHYDRATASE PHEA                                             |
| ☆Rv3839  |       | 1.65 | 5.74  | CONSERVED HYPOTHETICAL PROTEIN                                          |
| ☉Rv3842c | glpQ1 | 2.67 | 2.16  | GLYCEROPHOSPHORYL DIESTER PHOSPHODIESTERASE GLPQ1                       |
| Rv3858c  | gltD  | 4.99 | 1.94  | NADH-DEPENDENT GLUTAMATE SYNTHASE (SMALL SUBUNIT) GLTD                  |
| Rv3859c  | gltB  | 0.83 | 2.85  | PROBABLE FERREDOXIN-DEPENDENT GLUTAMATE SYNTHASE GLTB                   |
| Rv3870   |       | 3.12 | 3.04  | CONSERVED TRANSMEMBRANE PROTEIN                                         |
| Rv3871   |       | 2.22 | 2.23  | CONSERVED HYPOTHETICAL PROTEIN                                          |

|         |      |      |                                  |
|---------|------|------|----------------------------------|
| Rv3879c | 0.08 | 2.58 | ALANINE AND PROLINE RICH PROTEIN |
| Rv3884c | 0.75 | 2.37 | CBXX/CFQX FAMILY PROTEIN         |
| Rv3885c | 0.14 | 1.83 | CONSERVED MEMBRANE PROTEIN       |
| Rv3888c | 1.25 | 2.27 | CONSERVED MEMBRANE PROTEIN       |
| Rv3889c | 4.93 | 1.72 | HYPOTHETICAL PROTEIN             |
| Rv3892c | 1.26 | 2.32 | PPE                              |
| Rv3905c | 4.54 | 9.88 | ESAT-6 LIKE PROTEIN ESXF         |

☛ Genes found to be repressed in *M. tuberculosis* (H37Rv) under low-iron conditions by Rodriguez *et al.* (2002).

☆ Genes found to be upregulated in *M. tuberculosis* (H37Rv) under low-iron conditions by Rodriguez *et al.* (2002).
