# Supplementary material
Source: PubMed Central journal article supplement (PMC3123377)
Supplement: NIHMS28559-supplement-tableS2.pdf [file NIHMS28559-supplement-tableS2.pdf]

**Supplementary Table S2.** Genes upregulated under iron-replete growth

| <b>Rv no.</b> | <b>Gene name</b> | <b>B</b> | <b>Fold change</b> | <b>Putative function</b>                           |
|---------------|------------------|----------|--------------------|----------------------------------------------------|
| ☆Rv0001       | dnaA             | 0.59     | 0.38               | CHROMOSOMAL REPLICATION INITIATOR PROTEIN          |
| Rv0007        |                  | 3.24     | 0.33               | CONSERVED MEMBRANE PROTEIN                         |
| Rv0011c       |                  | 4.84     | 0.23               | CONSERVED MEMBRANE PROTEIN                         |
| Rv0022c       |                  | 1.62     | 0.19               | TRANSCRIPTIONAL REGULATORY PROTEIN WHIB-LIKE WHIB5 |
| Rv0025        |                  | 0.28     | 0.43               | CONSERVED HYPOTHETICAL PROTEIN                     |
| Rv0027        |                  | 0.88     | 0.22               | CONSERVED HYPOTHETICAL PROTEIN                     |
| Rv0028        |                  | 3.40     | 0.12               | CONSERVED HYPOTHETICAL PROTEIN                     |
| Rv0030        |                  | 1.10     | 0.31               | CONSERVED HYPOTHETICAL PROTEIN                     |
| Rv0031        |                  | 1.88     | 0.23               | REMNANT OF A TRANSPOSASE                           |
| Rv0033        |                  | 7.89     | 0.08               | ACYL CARRIER PROTEIN ACPA (ACP)                    |
| Rv0053        | rpsF             | 5.22     | 0.27               | 30S RIBOSOMAL PROTEIN S6 RPSF                      |
| Rv0055        | rpsR             | 4.33     | 0.23               | 30S RIBOSOMAL PROTEIN S18-1 RPSR1                  |
| Rv0060        |                  | 1.04     | 0.01               | CONSERVED HYPOTHETICAL PROTEIN                     |
| Rv0067c       |                  | 4.87     | 0.18               | TRANSCRIPTIONAL REGULATORY PROTEIN (TETR-FAMILY)   |
| Rv0072        |                  | 6.95     | 0.13               | GLUTAMINE-TRANSPORT TRANSMEMBRANE PROTEIN          |
| Rv0077c       |                  | 2.16     | 0.42               | OXIDOREDUCTASE                                     |
| Rv0081        |                  | 1.44     | 0.10               | TRANSCRIPTIONAL REGULATORY PROTEIN                 |
| Rv0088        |                  | 0.38     | 0.49               | HYPOTHETICAL PROTEIN                               |
| Rv0091        |                  | 1.07     | 0.43               | BIFUNCTIONAL MTA/SAH NUCLEOSIDASE                  |
| Rv0095c       |                  | 3.534    | 0.18               | CONSERVED HYPOTHETICAL PROTEIN                     |
| Rv0166        | fadD5.           | 0.94     | 0.28               | FATTY-ACID-COA LIGASE FADD5                        |
| Rv0167        |                  | 3.53     | 0.25               | INTEGRAL MEMBRANE PROTEIN YRBE1A                   |
| Rv0168        |                  | 2.75     | 0.30               | INTEGRAL MEMBRANE PROTEIN YRBE1B                   |
| Rv0169        | mce1.            | 0.39     | 0.48               | MCE-FAMILY PROTEIN MCE1A                           |
| Rv0171        |                  | 3.86     | 0.33               | MCE-FAMILY PROTEIN MCE1C                           |

|          |             |      |      |                                                             |
|----------|-------------|------|------|-------------------------------------------------------------|
| Rv0173   | lprK.       | 0.45 | 0.50 | MCE-FAMILY LIPOPROTEIN LPRK                                 |
| Rv0179c  | lprO.       | 2.53 | 0.28 | LIPOPROTEIN LPRO                                            |
| ☉Rv0250c |             | 2.56 | 0.35 | CONSERVED HYPOTHETICAL PROTEIN                              |
| Rv0256c  |             | 0.58 | 0.46 | PPE                                                         |
| Rv0257c  |             | 2.38 | 0.37 | CONSERVED HYPOTHETICAL PROTEIN                              |
| Rv0273c  |             | 3.43 | 0.29 | TRANSCRIPTIONAL REGULATORY PROTEIN                          |
| Rv0280   | PPE         | 1.65 | 0.24 | PPE                                                         |
| Rv0297   | PE.<br>PGRS | 1.84 | 0.47 | PE.PGRS                                                     |
| Rv0298   |             | 4.56 | 0.33 | HYPOTHETICAL PROTEIN                                        |
| Rv0302   |             | 0.21 | 0.53 | TRANSCRIPTIONAL REGULATORY PROTEIN<br>(TETR/ACRR-FAMILY)    |
| Rv0322   | udgA.       | 4.08 | 0.24 | PROBABLE UDP-GLUCOSE 6-DEHYDROGENASE UDGA                   |
| Rv0324   |             | 1.91 | 0.39 | TRANSCRIPTIONAL REGULATORY PROTEIN (ARSR-<br>FAMILY)        |
| Rv0360c  |             | 2.93 | 0.24 | CONSERVED HYPOTHETICAL PROTEIN                              |
| Rv0366c  |             | 3.96 | 0.18 | CONSERVED HYPOTHETICAL PROTEIN                              |
| Rv0369c  |             | 1.95 | 0.42 | MEMBRANE OXIDOREDUCTASE                                     |
| Rv0403c  | mmpS1.      | 0.38 | 0.45 | CONSERVED MEMBRANE PROTEIN MMPS1                            |
| Rv0404   | fadD30.     | 3.99 | 0.24 | FATTY-ACID-COA LIGASE FADD30 (FATTY-ACID-COA<br>SYNTHETASE) |
| ☉Rv0430  |             | 6.30 | 0.22 | CONSERVED HYPOTHETICAL PROTEIN                              |
| Rv0431   |             | 2.85 | 0.40 | TUBERCULIN RELATED PEPTIDE                                  |
| Rv0435c  |             | 1.33 | 0.21 | CONSERVED ATPASE                                            |
| Rv0443   |             | 1.54 | 0.42 | CONSERVED HYPOTHETICAL PROTEIN                              |
| Rv0460   |             | 1.06 | 0.41 | CONSERVED HYDROPHOBIC PROTEIN                               |
| ☆Rv0463  |             | 0.69 | 0.50 | CONSERVED MEMBRANE PROTEIN                                  |
| Rv0477   |             | 4.09 | 0.26 | CONSERVED SECRETED PROTEIN                                  |
| Rv0506   | mmpS2.      | 3.43 | 0.41 | CONSERVED MEMBRANE PROTEIN MMPS2                            |
| Rv0544c  |             | 5.19 | 0.28 | CONSERVED TRANSMEMBRANE PROTEIN                             |
| Rv0565c  |             | 0.45 | 0.51 | MONOOXYGENASE                                               |

|         |             |      |      |                                                     |
|---------|-------------|------|------|-----------------------------------------------------|
| Rv0581  |             | 2.39 | 0.38 | CONSERVED HYPOTHETICAL PROTEIN                      |
| Rv0602c | tcrA.       | 2.27 | 0.27 | TWO COMPONENT DNA BINDING TRANSCRIPTIONAL REGULATOR |
| Rv0604  | lpqO.       | 2.36 | 0.43 | CONSERVED LIPOPROTEIN LPQO                          |
| Rv0625c |             | 0.57 | 0.36 | CONSERVED TRANSMEMBRANE PROTEIN                     |
| Rv0651  | rplJ.       | 1.57 | 0.47 | 50S RIBOSOMAL PROTEIN L10 RPLJ                      |
| Rv0661c |             | 0.67 | 0.39 | CONSERVED HYPOTHETICAL PROTEIN                      |
| Rv0662c |             | 1.03 | 0.47 | CONSERVED HYPOTHETICAL PROTEIN                      |
| Rv0683  | rpsG.       | 1.03 | 0.42 | 30S RIBOSOMAL PROTEIN S7 RPSG                       |
| Rv0689c |             | 4.00 | 0.29 | HYPOTHETICAL PROTEIN                                |
| Rv0690c |             | 0.57 | 0.52 | CONSERVED HYPOTHETICAL PROTEIN                      |
| Rv0698  |             | 4.54 | 0.19 | CONSERVED HYPOTHETICAL PROTEIN                      |
| Rv0699  |             | 2.22 | 0.19 | HYPOTHETICAL PROTEIN                                |
| Rv0702  | rplD.       | 1.86 | 0.48 | 50S RIBOSOMAL PROTEIN L4 RPLD                       |
| Rv0705  | rpsS.       | 2.58 | 0.44 | 30S RIBOSOMAL PROTEIN S19 RPSS                      |
| Rv0724  | sppA.       | 1.23 | 0.40 | POSSIBLE PROTEASE IV SPPA                           |
| Rv0731c |             | 2.68 | 0.35 | CONSERVED HYPOTHETICAL PROTEIN                      |
| Rv0739  |             | 1.85 | 0.19 | CONSERVED HYPOTHETICAL PROTEIN                      |
| Rv0742  | PE.<br>PGRS | 2.18 | 0.34 | PE.PGRS                                             |
| Rv0743c |             | 4.45 | 0.35 | HYPOTHETICAL PROTEIN                                |
| Rv0748  |             | 3.59 | 0.30 | CONSERVED HYPOTHETICAL PROTEIN                      |
| Rv0750  |             | 0.12 | 0.52 | CONSERVED HYPOTHETICAL PROTEIN                      |
| Rv0759c |             | 4.87 | 0.37 | CONSERVED HYPOTHETICAL PROTEIN                      |
| Rv0762c |             | 0.23 | 0.46 | CONSERVED HYPOTHETICAL PROTEIN                      |
| Rv0763c |             | 0.30 | 0.45 | FERREDOXIN                                          |
| Rv0767c |             | 0.74 | 0.44 | CONSERVED HYPOTHETICAL PROTEIN                      |
| Rv0781  | ptrBb.      | 3.12 | 0.34 | PROTEASE II PTRBA                                   |
| Rv0793  |             | 0.9  | 0.32 | CONSERVED HYPOTHETICAL PROTEIN                      |

|          |       |      |      |                                                     |
|----------|-------|------|------|-----------------------------------------------------|
| Rv0800   | pepC. | 1.64 | 0.46 | AMINOPEPTIDASE PEPC                                 |
| Rv0801   |       | 0.45 | 0.42 | CONSERVED HYPOTHETICAL PROTEIN                      |
| Rv0829   |       | 2.16 | 0.45 | TRANSPOSASE (FRAGMENT)                              |
| ☆Rv0878c | PPE   | 1.45 | 0.43 | PPE                                                 |
| Rv0879c  |       | 1.97 | 0.36 | CONSERVED TRANSMEMBRANE PROTEIN                     |
| Rv0893c  |       | 0.33 | 0.48 | CONSERVED HYPOTHETICAL PROTEIN                      |
| Rv0903c  | prpA  | 1.85 | 0.03 | TWO COMPONENT RESPONSE TRANSCRIPTIONAL<br>REGULATOR |
| Rv0927c  |       | 3.03 | 0.30 | SHORT-CHAIN TYPE DEHYDROGENASE/REDUCTASE            |
| Rv0947c  |       | 0.93 | 0.32 | MYCOLYL TRANSFERASE                                 |
| Rv0957   | purH. | 0.05 | 0.50 | BIFUNCTIONAL PURINE BIOSYNTHESIS PROTEIN PURH       |
| Rv0977   | PE    | 0.56 | 0.42 | PE                                                  |
| Rv0979c  |       | 3.46 | 0.37 | 50S RIBOSOMAL PROTEIN L32 RPMF                      |
| Rv0992c  |       | 0.53 | 0.36 | CONSERVED HYPOTHETICAL PROTEIN                      |
| Rv1012   |       | 2.46 | 0.30 | HYPOTHETICAL PROTEIN                                |
| Rv1040c  | PE    | 3.65 | 0.31 | PE                                                  |
| Rv1053c  |       | 1.92 | 0.46 | HYPOTHETICAL PROTEIN                                |
| Rv1083   |       | 2.11 | 0.33 | CONSERVED HYPOTHETICAL PROTEIN                      |
| Rv1089   | PE    | 4.59 | 0.10 | PE                                                  |
| Rv1103c  |       | 0.22 | 0.53 | CONSERVED HYPOTHETICAL PROTEIN                      |
| Rv1105   |       | 0.11 | 0.28 | PARA-NITROBENZYL ESTERASE                           |
| Rv1107c  | xseB. | 0.42 | 0.50 | EXODEOXYRIBONUCLEASE VII (SMALL SUBUNIT)<br>XSEA    |
| Rv1119c  |       | 1.26 | 0.29 | HYPOTHETICAL PROTEIN                                |
| Rv1124   | ephC. | 1.34 | 0.39 | EPOXIDE HYDROLASE EPHC                              |
| Rv1135c  | PPE   | 5.89 | 0.18 | PPE                                                 |
| Rv1154c  |       | 2.79 | 0.42 | HYPOTHETICAL PROTEIN                                |
| Rv1172c  | PE    | 4.23 | 0.22 | PE                                                  |
| Rv1230c  |       | 3.65 | 0.36 | MEMBRANE PROTEIN                                    |

|         |        |      |      |                                                   |
|---------|--------|------|------|---------------------------------------------------|
| Rv1241  |        | 0.13 | 0.53 | CONSERVED HYPOTHETICAL PROTEIN                    |
| Rv1261c |        | 0.35 | 0.57 | CONSERVED HYPOTHETICAL PROTEIN                    |
| Rv1271c |        | 1.13 | 0.36 | CONSERVED HYPOTHETICAL SECRETED PROTEIN           |
| ⊕Rv1305 | atpE.  | 0.46 | 0.52 | ATP SYNTHASE C CHAIN ATPE (LIPID-BINDING PROTEIN) |
| Rv1320c |        | 2.42 | 0.45 | ADENYLATE CYCLASE (ATP PYROPHOSPHATE-LYASE        |
| Rv1363c |        | 1.91 | 0.42 | MEMBRANE PROTEIN                                  |
| Rv1365c |        | 1.30 | 0.33 | ANTI-ANTI-SIGMA FACTOR RSFA                       |
| Rv1372  | pks18  | 1.57 | 0.34 | CONSERVED HYPOTHETICAL PROTEIN                    |
| RV1386  | PE     | 3.88 | 0.31 | PE                                                |
| Rv1403c |        | 0.81 | 0.28 | METHYLTRANSFERASE                                 |
| Rv1423  |        | 0.32 | 0.45 | TRANSCRIPTIONAL REGULATORY PROTEIN WHIA           |
| Rv1426c | lipO   | 1.87 | 0.43 | ESTERASE LIPO                                     |
| Rv1430  | PE     | 0.57 | 0.44 | PE                                                |
| Rv1453  |        | 0.79 | 0.03 | TRANSCRIPTIONAL ACTIVATOR PROTEIN                 |
| Rv1470  | trxA   | 0.05 | 0.34 | THIOREDOXIN TRXA                                  |
| Rv1506c |        | 6.30 | 0.20 | HYPOTHETICAL PROTEIN                              |
| Rv1507c |        | 1.08 | 0.44 | CONSERVED HYPOTHETICAL PROTEIN                    |
| Rv1549  | fadD11 | 1.04 | 0.36 | FATTY-ACID-COA LIGASE FADD11                      |
| Rv1550  | fadD11 | 5.60 | 0.18 | FATTY-ACID-COA LIGASE FADD11                      |
| Rv1555  | frdD   | 8.46 | 0.09 | FUMARATE REDUCTASE                                |
| Rv1580c |        | 2.20 | 0.43 | PROBABLE PHIRV1 PHAGE PROTEIN                     |
| Rv1581c |        | 2.13 | 0.44 | PROBABLE PHIRV1 PHAGE PROTEIN                     |
| Rv1622c | cydB   | 3.89 | 0.01 | INTEGRAL MEMBRANE CYTOCHROME D UBIQUINOL OXIDASE  |
| Rv1642  | rpmI.  | 1.06 | 0.42 | 50S RIBOSOMAL PROTEIN L35 RPMI                    |
| Rv1645c |        | 3.29 | 0.32 | CONSERVED HYPOTHETICAL PROTEIN                    |
| Rv1660  | pks10. | 0.88 | 0.50 | CHALCONE SYNTHASE PKS10                           |
| Rv1665  | pks11. | 7.01 | 0.21 | CHALCONE SYNTHASE PKS11                           |

|          |             |      |      |                                               |
|----------|-------------|------|------|-----------------------------------------------|
| Rv1705c  | PPE         | 4.66 | 0.21 | PPE                                           |
| Rv1729c  |             | 1.13 | 0.37 | CONSERVED HYPOTHETICAL PROTEIN                |
| Rv1759   | PE.<br>PGRS | 0.55 | 0.43 | PE.PGRS                                       |
| Rv1766   |             | 2.03 | 0.43 | CONSERVED HYPOTHETICAL PROTEIN                |
| Rv1790   | PPE         | 0.33 | 0.54 | PPE                                           |
| Rv1801   | PPE         | 1.25 | 0.43 | PPE                                           |
| Rv1851   | ureF        | 4.08 | 0.40 | UREASE ACCESSORY PROTEIN UREF                 |
| Rv1802   | PPE         | 2.03 | 0.35 | PPE                                           |
| Rv1860   | modD        | 3.43 | 0.38 | ALANINE AND PROLINE RICH SECRETED PROTEIN APA |
| ☆Rv1871c |             | 0.25 | 0.58 | CONSERVED HYPOTHETICAL PROTEIN                |
| ☉Rv1876  | bfrA        | 4.94 | 0.21 | BACTERIOFERRITIN BFRA                         |
| Rv1884c  |             | 4.29 | 0.27 | RESUSCITATION-PROMOTING FACTOR RPFC           |
| Rv1893   |             | 0.23 | 0.49 | CONSERVED HYPOTHETICAL PROTEIN                |
| Rv1909c  | furA        | 0.54 | 0.54 | FERRIC UPTAKE REGULATION PROTEIN FURA (FUR)   |
| Rv1916   | aceAb       | 1.02 | 0.48 | ISOCITRATE LYASE ACEAB [SECOND PART]          |
| ☉Rv1943c |             | 0.44 | 0.54 | CONSERVED HYPOTHETICAL PROTEIN                |
| Rv1952   |             | 4.09 | 0.21 | CONSERVED HYPOTHETICAL PROTEIN                |
| Rv1957   |             | 4.19 | 0.24 | HYPOTHETICAL PROTEIN                          |
| Rv1961   |             | 3.71 | 0.31 | HYPOTHETICAL PROTEIN                          |
| Rv1962c  |             | 1.18 | 0.53 | CONSERVED HYPOTHETICAL PROTEIN                |
| Rv1972   |             | 1.58 | 0.39 | CONSERVED MCE ASSOCIATED MEMBRANE PROTEIN     |
| Rv1981c  | nrdF        | 0.79 | 0.33 | CONSERVED HYPOTHETICAL PROTEIN                |
| Rv2020c  |             | 5.23 | 0.32 | CONSERVED HYPOTHETICAL PROTEIN                |
| Rv2055c  | rpsR2       | 0.77 | 0.29 | RIBOSOMAL PROTEIN S18 RPSR2                   |
| Rv2060   |             | 2.62 | 0.24 | CONSERVED INTEGRAL MEMBRANE PROTEIN           |
| Rv2063c  |             | 2.33 | 0.35 | CONSERVED HYPOTHETICAL PROTEIN                |
| Rv2083   |             | 0.12 | 0.48 | CONSERVED HYPOTHETICAL PROTEIN                |

|         |       |      |      |                                                 |
|---------|-------|------|------|-------------------------------------------------|
| Rv2085  |       | 0.22 | 0.34 | CONSERVED HYPOTHETICAL PROTEIN                  |
| Rv2111c |       | 4.76 | 0.23 | CONSERVED HYPOTHETICAL PROTEIN                  |
| Rv2127  | ansP  | 3.83 | 0.36 | L-ASPARAGINE PERMEASE ANSP1                     |
| Rv2128  |       | 2.21 | 0.39 | CONSERVED TRANSMEMBRANE PROTEIN                 |
| Rv2186c |       | 0.84 | 0.52 | CONSERVED HYPOTHETICAL PROTEIN                  |
| Rv2197c |       | 2.79 | 0.41 | CONSERVED TRANSMEMBRANE PROTEIN                 |
| Rv2198c | mmpS3 | 0.11 | 0.34 | CONSERVED MEMBRANE PROTEIN MMPS3                |
| Rv2223c |       | 1.55 | 0.41 | EXPORTED PROTEASE                               |
| Rv2232  |       | 1.89 | 0.41 | CONSERVED HYPOTHETICAL PROTEIN                  |
| Rv2237  |       | 0.74 | 0.53 | CONSERVED HYPOTHETICAL PROTEIN                  |
| Rv2242  |       | 2.72 | 0.38 | CONSERVED HYPOTHETICAL PROTEIN                  |
| Rv2249c | glpD1 | 5.81 | 0.19 | GLYCEROL-3-PHOSPHATE DEHYDROGENASE GLPD1        |
| Rv2270  | lppN  | 5.04 | 0.26 | LIPOPROTEIN LPPN                                |
| Rv2274c |       | 4.64 | 0.19 | HYPOTHETICAL PROTEIN                            |
| Rv2284  | lipM  | 0.48 | 0.53 | ESTERASE LIPM                                   |
| Rv2288  |       | 2.78 | 0.28 | HYPOTHETICAL PROTEIN                            |
| Rv2292c |       | 6.52 | 0.21 | HYPOTHETICAL PROTEIN                            |
| Rv2295  |       | 3.52 | 0.39 | CONSERVED HYPOTHETICAL PROTEIN                  |
| Rv2304c |       | 0.13 | 0.44 | HYPOTHETICAL PROTEIN                            |
| Rv2311  |       | 4.68 | 0.23 | CONSERVED HYPOTHETICAL PROTEIN                  |
| Rv2331  |       | 0.09 | 0.50 | HYPOTHETICAL PROTEIN                            |
| Rv2338c | moeW  | 0.40 | 0.59 | MOLYBDOPTERIN BIOSYNTHESIS PROTEIN MOEW         |
| Rv2339  | mmpL9 | 4.04 | 0.34 | CONSERVED TRANSMEMBRANE TRANSPORT PROTEIN MMPL9 |
| Rv2341  | LppQ  | 2.87 | 0.18 | CONSERVED LIPOPROTEIN LPPQ                      |
| Rv2342  |       | 1.16 | 0.52 | CONSERVED HYPOTHETICAL PROTEIN                  |
| Rv2349c | plcC  | 0.24 | 0.46 | PHOSPHOLIPASE C 3 PLCC                          |
| Rv2350c | plcB  | 0.74 | 0.36 | MEMBRANE-ASSOCIATED PHOSPHOLIPASE C 2 PLCB      |

|          |             |      |      |                                                                     |
|----------|-------------|------|------|---------------------------------------------------------------------|
| Rv2356c  | PPE         | 2.86 | 0.36 | PPE                                                                 |
| Rv2396c  | PE<br>PGRS  | 1.04 | 0.50 | PE.PGRS                                                             |
| Rv2399c  | cysT        | 1.83 | 0.52 | SULFATE-TRANSPORT INTEGRAL MEMBRANE PROTEIN<br>ABC TRANSPORTER CYST |
| Rv2401   |             | 0.13 | 0.38 | CONSERVED MEMBRANE PROTEIN                                          |
| Rv2406c  |             | 5.49 | 0.34 | CONSERVED HYPOTHETICAL PROTEIN                                      |
| Rv2416c  |             | 0.59 | 0.53 | ENHANCED INTRACELLULAR SURVIVAL PROTEIN EIS                         |
| Rv2418c  |             | 1.24 | 0.31 | HYPOTHETICAL PROTEIN                                                |
| Rv2741   | PE.<br>PGRS | 3.64 | 0.46 | PE.PGRS                                                             |
| Rv2472   |             | 3.24 | 0.40 | CONSERVED HYPOTHETICAL PROTEIN                                      |
| Rv2485c  | lipQ        | 2.82 | 0.24 | CARBOXYLESTERASE LIPQ                                               |
| Rv2493   |             | 2.93 | 0.45 | CITRATE (PRO-3S)-LYASE (BETA SUBUNIT) CITE                          |
| Rv2517c  |             | 5.68 | 0.40 | HYPOTHETICAL PROTEIN                                                |
| ⊕Rv2526  |             | 2.94 | 0.23 | HYPOTHETICAL PROTEIN                                                |
| Rv2529   |             | 0.79 | 0.47 | HYPOTHETICAL PROTEIN                                                |
| Rv2537c  | aroD        | 0.47 | 0.53 | 3-DEHYDROQUINATE DEHYDRATASE AROD                                   |
| Rv2547   |             | 3.04 | 0.38 | CONSERVED HYPOTHETICAL PROTEIN                                      |
| ⊕Rv2549c |             | 0.81 | 0.36 | CONSERVED HYPOTHETICAL PROTEIN                                      |
| Rv2560   |             | 0.06 | 0.50 | PROLINE AND GLYCINE RICH TRANSMEMBRANE<br>PROTEIN                   |
| Rv2561   |             | 4.07 | 0.44 | CONSERVED HYPOTHETICAL PROTEIN                                      |
| Rv2562   |             | 3.59 | 0.41 | CONSERVED HYPOTHETICAL PROTEIN                                      |
| Rv2564   | glnQ        | 1.09 | 0.34 | GLUTAMINE-TRANSPORT ATP-BINDING PROTEIN                             |
| Rv2599   |             | 1.07 | 0.39 | CONSERVED MEMBRANE PROTEIN                                          |
| Rv2600   |             | 3.78 | 0.29 | CONSERVED INTEGRAL MEMBRANE PROTEIN                                 |
| Rv2608   | PPE         | 1.07 | 0.36 | PPE                                                                 |
| Rv2615c  | PE.PGRS     | 0.80 | 0.47 | PE.PGRS                                                             |
| Rv2632c  |             | 2.84 | 0.43 | CONSERVED HYPOTHETICAL PROTEIN                                      |
| Rv2640c  |             | 3.96 | 0.15 | TRANSCRIPTIONAL REGULATORY PROTEIN (ARSR-<br>FAMILY)                |



|          |      |      |      |                                                      |
|----------|------|------|------|------------------------------------------------------|
| Rv2645   |      | 5.41 | 0.15 | HYPOTHETICAL PROTEIN                                 |
| Rv2653c  |      | 0.81 | 0.35 | PHIRV2 PROPHAGE PROTEIN                              |
| Rv2657c  |      | 1.31 | 0.45 | PHIRV2 PROPHAGE PROTEIN                              |
| Rv2658c  |      | 2.47 | 0.44 | PROPHAGE PROTEIN                                     |
| Rv2664   |      | 2.08 | 0.42 | HYPOTHETICAL PROTEIN                                 |
| Rv2665   |      | 4.26 | 0.35 | HYPOTHETICAL ARGININE RICH PROTEIN                   |
| Rv2669   |      | 0.83 | 0.27 | HYPOTHETICAL PROTEIN                                 |
| Rv2687c  |      | 1.73 | 0.28 | INTEGRAL MEMBRANE LEUCINE AND VALINE RICH PROTEIN    |
| Rv2691   | trkA | 3.13 | 0.48 | TRK SYSTEM POTASSIUM UPTAKE PROTEIN CEOB             |
| Rv2717c  |      | 1.28 | 0.38 | CONSERVED HYPOTHETICAL PROTEIN                       |
| Rv2760c  |      | 4.32 | 0.13 | CONSERVED HYPOTHETICAL PROTEIN                       |
| Rv2762c  |      | 1.50 | 0.43 | CONSERVED HYPOTHETICAL PROTEIN                       |
| Rv2781c  |      | 0.53 | 0.53 | ALANINE RICH OXIDOREDUCTASE                          |
| Rv2785c  | rpsO | 0.69 | 0.52 | 30S RIBOSOMAL PROTEIN S15 RPSO                       |
| Rv2804c  |      | 0.35 | 0.41 | HYPOTHETICAL PROTEIN                                 |
| ☆Rv2816c |      | 1.94 | 0.42 | CONSERVED HYPOTHETICAL PROTEIN                       |
| Rv2820c  |      | 2.26 | 0.46 | HYPOTHETICAL ARGININE AND ALANINE RICH PROTEIN       |
| Rv2910c  |      | 0.16 | 0.41 | CONSERVED HYPOTHETICAL PROTEIN                       |
| Rv2952   |      | 1.79 | 0.42 | METHYLTRANSFERASE (METHYLASE                         |
| Rv2960c  |      | 4.47 | 0.33 | HYPOTHETICAL PROTEIN                                 |
| Rv2962c  |      | 1.90 | 0.47 | GLYCOSYL TRANSFERASE                                 |
| Rv2965c  | kdtB | 1.17 | 0.32 | PHOSPHOPANTETHEINE ADENYLYLTRANSFERASE KDTB          |
| Rv2997   |      | 1.58 | 0.41 | ALANINE RICH DEHYDROGENASE                           |
| Rv3007c  |      | 2.02 | 0.47 | OXIDOREDUCTASE                                       |
| Rv3012c  | gatC | 0.59 | 0.53 | GLUTAMYL-TRNA(GLN) AMIDOTRANSFERASE (SUBUNIT C) GATC |
| Rv3015c  |      | 1.09 | 0.33 | CONSERVED HYPOTHETICAL PROTEIN                       |
| Rv3017c  |      | 1.12 | 0.47 | ESAT-6 LIKE PROTEIN ESXQ                             |

|          |       |      |      |                                                    |
|----------|-------|------|------|----------------------------------------------------|
| Rv3033   |       | 0.09 | 0.51 | HYPOTHETICAL PROTEIN                               |
| Rv3036c  |       | 0.70 | 0.46 | CONSERVED SECRETED PROTEIN TB22.2                  |
| Rv3063   | cstA  | 2.49 | 0.47 | CARBON STARVATION PROTEIN A HOMOLOG CSTA           |
| Rv3065   | emrE  | 1.48 | 0.39 | MULTIDRUGS-TRANSPORT INTEGRAL MEMBRANE PROTEIN MMR |
| Rv3067   |       | 1.78 | 0.45 | CONSERVED HYPOTHETICAL PROTEIN                     |
| Rv3076   |       | 1.18 | 0.48 | CONSERVED HYPOTHETICAL PROTEIN                     |
| Rv3085   |       | 0.65 | 0.19 | SHORT-CHAIN TYPE DEHYDROGENASE/REDUCTASE           |
| Rv3088   |       | 1.58 | 0.43 | CONSERVED HYPOTHETICAL PROTEIN                     |
| Rv3093c  |       | 1.82 | 0.54 | HYPOTHETICAL OXIDOREDUCTASE                        |
| Rv3018c  |       | 0.32 | 0.43 | PPE                                                |
| Rv3106   | fprA  | 0.18 | 0.49 | NADPH:ADRENODOXIN OXIDOREDUCTASE FPRA              |
| Rv3110   | moaB  | 6.08 | 0.15 | PTERIN-4-ALPHA-CARBINOLAMINE DEHYDRATASE MOAB1     |
| Rv3119   | moaE  | 0.08 | 0.46 | MOLYBDENUM COFACTOR BIOSYNTHESIS PROTEIN E MOAE1   |
| Rv3125c  | PPE   | 2.16 | 0.45 | PPE                                                |
| Rv3142c  |       | 2.62 | 0.42 | HYPOTHETICAL PROTEIN                               |
| Rv3143   |       | 3.18 | 0.32 | RESPONSE REGULATOR                                 |
| ⊕Rv3147  | nuoC  | 0.20 | 0.51 | NADH DEHYDROGENASE I                               |
| Rv3151   | nuoG  | 0.40 | 0.39 | NADH DEHYDROGENASE I (CHAIN G) NUOG                |
| ⊕Rv3155  | nuoK  | 0.74 | 0.31 | NADH DEHYDROGENASE I (CHAIN K) NUOK                |
| Rv3165c  |       | 3.03 | 0.37 | HYPOTHETICAL PROTEIN                               |
| Rv3178   |       | 4.33 | 0.19 | CONSERVED HYPOTHETICAL PROTEIN                     |
| Rv3183   |       | 0.48 | 0.34 | TRANSCRIPTIONAL REGULATORY PROTEIN                 |
| Rv3222c  |       | 0.12 | 0.50 | CONSERVED HYPOTHETICAL PROTEIN                     |
| Rv3243c  |       | 1.52 | 0.47 | HYPOTHETICAL PROTEIN                               |
| Rv3280   | accD5 | 0.81 | 0.48 | PROPIONYL-COA CARBOXYLASE BETA CHAIN 5 ACCD5       |
| Rv3317   | sdhD  | 1.68 | 0.53 | SUCCINATE DEHYDROGENASE                            |
| ⊕Rv3320c |       | 4.66 | 0.32 | CONSERVED HYPOTHETICAL PROTEIN                     |

|          |             |        |      |                                                    |
|----------|-------------|--------|------|----------------------------------------------------|
| Rv3323c  | gphA        | 1.03   | 0.36 | MOAD-MOAE FUSION PROTEIN MOAX                      |
| Rv3345c  | PE.<br>PGRS | 0.43   | 0.34 | PE.PGRS                                            |
| ☆Rv3346c |             | 1.51   | 0.37 | CONSERVED TRANSMEMBRANE PROTEIN                    |
| Rv3353c  |             | 3.24   | 0.35 | CONSERVED HYPOTHETICAL PROTEIN                     |
| ☆Rv3354  |             | 3.67   | 0.41 | CONSERVED HYPOTHETICAL PROTEIN                     |
| Rv3386   |             | 3.0751 | 0.42 | TRANSPOSASE                                        |
| Rv3392c  | cmaA1       | 0.68   | 0.42 | CYCLOPROPANE-FATTY-ACYL-PHOSPHOLIPID<br>SYNTHASE 1 |
| Rv3444c  |             | 0.03   | 0.39 | ESAT-6 LIKE PROTEIN ESXT                           |
| Rv3494c  |             | 1.46   | 0.43 | MCE-FAMILY PROTEIN MCE4F                           |
| Rv3497c  |             | 0.71   | 0.42 | MCE-FAMILY PROTEIN MCE4F                           |
| Rv3511   | PE.<br>PGRS | 0.54   | 0.52 | PE.PGRS                                            |
| Rv3512   | PE.<br>PGRS | 0.53   | 0.26 | PE.PGRS                                            |
| Rv3558   | PPE         | 3.48   | 0.34 | PPE                                                |
| ☆Rv3612c |             | 3.19   | 0.43 | CONSERVED HYPOTHETICAL PROTEIN                     |
| ☆Rv3613c |             | 8.59   | 0.13 | HYPOTHETICAL PROTEIN                               |
| Rv3622c  |             | 1.06   | 0.26 | PE                                                 |
| Rv3640c  |             | 0.94   | 0.29 | TRANSPOSASE                                        |
| Rv3642c  |             | 0.70   | 0.44 | HYPOTHETICAL PROTEIN                               |
| Rv3746c  |             | 2.32   | 0.34 | PE                                                 |
| Rv3648c  | cspA        | 7.27   | 0.34 | COLD SHOCK PROTEIN A CSPA                          |
| Rv3687c  |             | 4.06   | 0.18 | ANTI-ANTI-SIGMA FACTOR RSFB                        |
| Rv3688c  |             | 1.53   | 0.36 | CONSERVED HYPOTHETICAL PROTEIN                     |
| Rv3702c  |             | 3.12   | 0.13 | CONSERVED HYPOTHETICAL PROTEIN                     |
| Rv3716c  |             | 0.60   | 0.30 | CONSERVED HYPOTHETICAL PROTEIN                     |
| Rv3724   |             | 0.51   | 0.54 | CUTINASE CUT5B                                     |
| Rv3729   |             | 0.28   | 0.32 | TRANSFERASE                                        |
| Rv3738c  |             | 2.47   | 0.51 | PPE                                                |

|         |      |      |      |                                                  |
|---------|------|------|------|--------------------------------------------------|
| Rv3744  |      | 2.38 | 0.43 | TRANSCRIPTIONAL REGULATORY PROTEIN (ARSR-FAMILY) |
| Rv3750c |      | 0.74 | 0.53 | EXCISIONASE                                      |
| Rv3752c |      | 0.93 | 0.40 | CYTIDINE/DEOXYCYTIDYLATE DEAMINASE               |
| Rv3760  |      | 1.53 | 0.45 | CONSERVED MEMBRANE PROTEIN                       |
| Rv3786c |      | 3.80 | 0.04 | HYPOTHETICAL PROTEIN                             |
| Rv3816c |      | 1.29 | 0.48 | ACYLTRANSFERASE                                  |
| ★Rv3841 | bfrB | 0.79 | 0.19 | BACTERIOFERRITIN BFRB                            |
| Rv3851  |      | 1.02 | 0.51 | MEMBRANE PROTEIN                                 |
| Rv3857c |      | 0.47 | 0.51 | MEMBRANE PROTEIN                                 |

★ Genes found to be repressed in *M. tuberculosis* (H37Rv) under low-iron conditions by Rodriguez et al. (2002).

☆ Genes found to be upregulated in *M. tuberculosis* (H37Rv) under low-iron conditions by Rodriguez et al. (2002).
